# Supplementary material for: Effects of chain length on oligopeptide hydrogelation
Source: Royal Society of Chemistry journal article supplement (doi:10.1039/c0sm00919a), 2011-01-01
Supplement: c0sm00919a.pdf [file c0sm00919a.pdf]

# Effects of Chain Length on Oligopeptide Hydrogelation

*Sivakumar Ramachandran, Marc B. Taraban, Ignacy Gryczynski, Zygmunt Gryczynski, Jill*

*Trewhella, and Yihua Bruce Yu \**

## Table of Contents

|                                                                                                                                     |    |
|-------------------------------------------------------------------------------------------------------------------------------------|----|
| <b>Figure S1.</b> Fluorescence emission intensity and anisotropy of the EAW6:OAW6 pair .....                                        | s2 |
| <b>Figure S2.</b> Tryptophan fluorescence anisotropy upon gelation of the EAW6:OAW6, EAW10:OAW10, and EAW14:OAW14 pairs .....       | s3 |
| <b>Figure S3.</b> $I(q)$ vs $q$ over time during the process of gelation of the EAW6:OAW6, EAW10:OAW10, and EAW14:OAW14 pairs ..... | s5 |

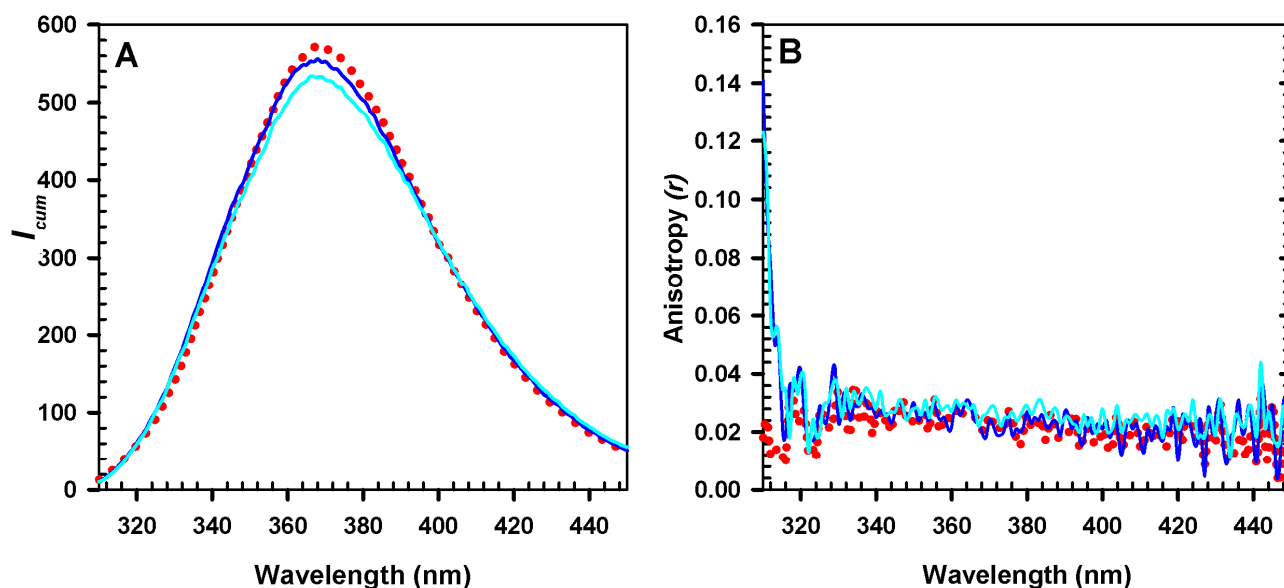

**Figure S1.** Tryptophan isotropic emission intensity  $I_{cum}$  (A) and tryptophan anisotropy  $r$  (B) for the EAW6:OAW6 peptide pair. (A) OAW6 solution (red dots); immediately after mixing (blue); 12 hours after mixing (cyan). (B) OAW6 solution (red dots); immediately after mixing (blue); 12 hours after mixing (cyan). No significant decrease in tryptophan's emission intensity or anisotropy was observed even after 12 hrs of mixing at 25°C. Anisotropy did not change significantly, but there was slight increase in Rayleigh scattering at lower wavelength after mixing.

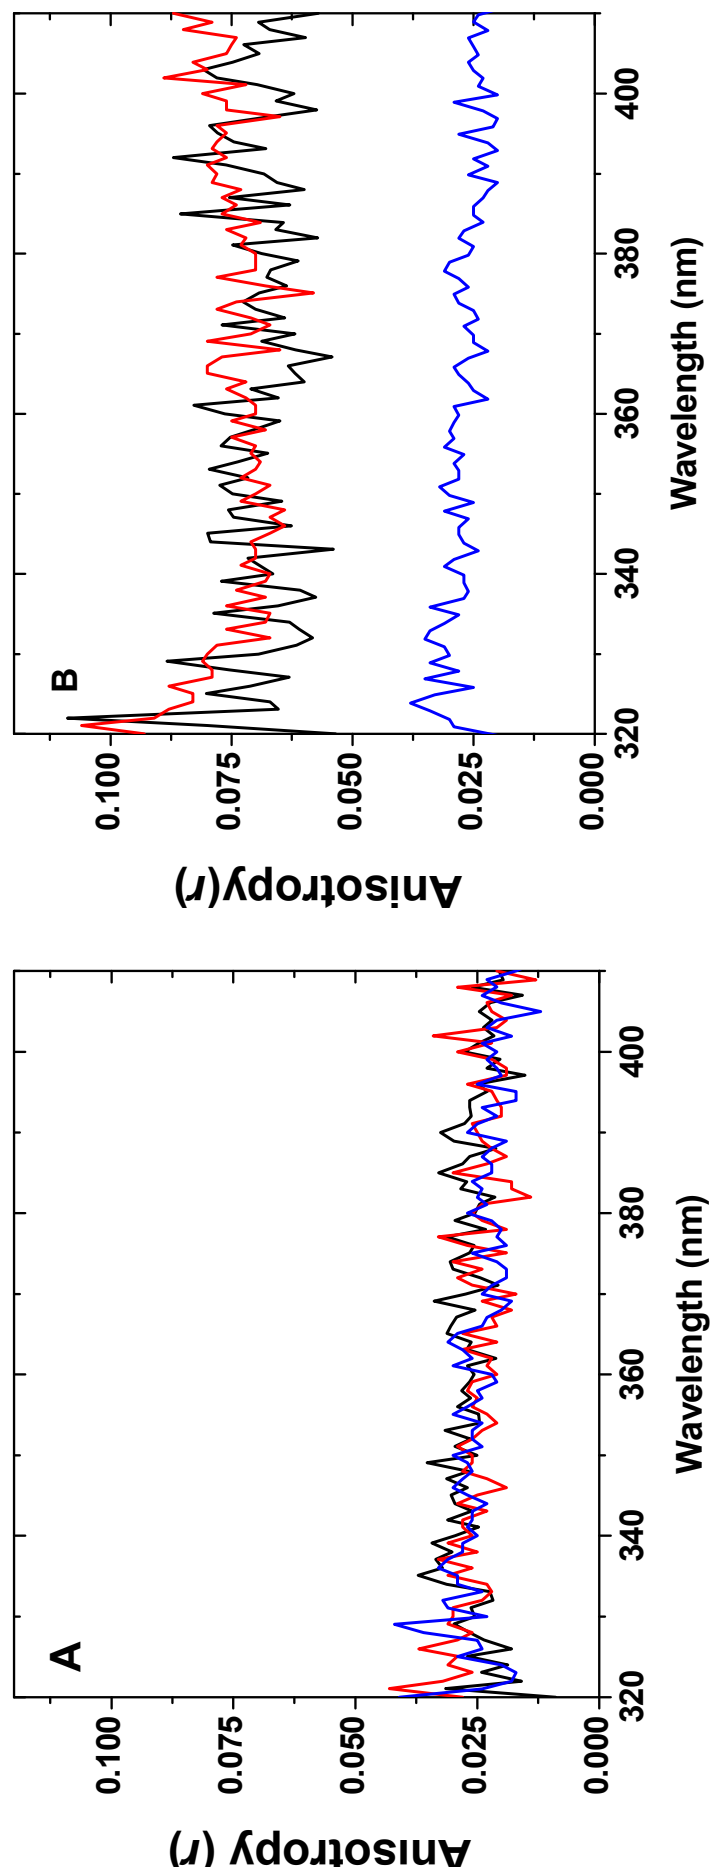

**Figure S2.** Tryptophan anisotropy  $r$  upon gelation of 6:6 (blue), EAW10:OAW10 (black), and EAW14:OAW14 (red) pairs at 25 °C. (A) Initial anisotropy immediately after mixing; (B) Anisotropy after the completion of the gelation. Equilibrium values after 12 hrs for EAW6:OAW6, 7 hrs for EAW10:OAW10 pair; equilibrium values for EAW14:OAW14 have been reached after 2 hrs (see also Figs. 1, 4 and 5). Rayleigh scattering was very high at lower wavelengths (below 315 nm).

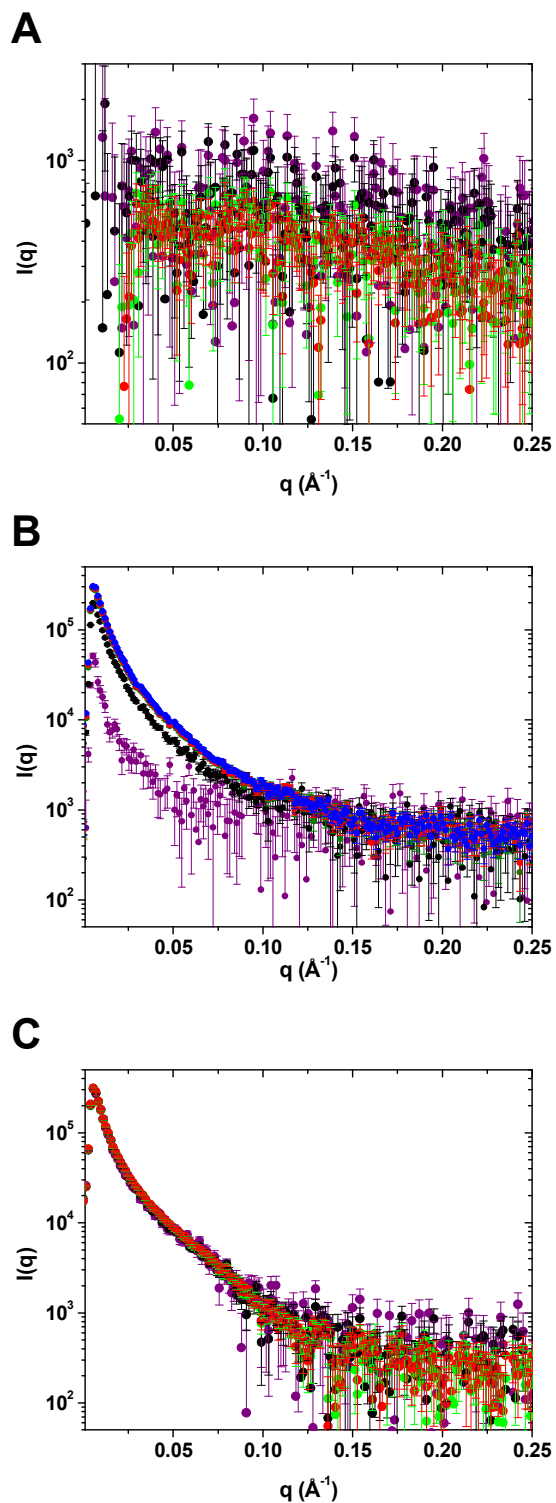

**Figure S3.**  $I(q)$  vs  $q$  over time during the gelation process of (A) EAW6:OAW6 pair (15 min, purple; 30 min, black; 6 hours, green; 12 hours, red); (B) EAW10:OAW10 pair: (15 min, purple; 1 hour, black; 5 hours, green; 8 hours, red; 24 hours, blue); (C) EAW14:OAW14 pair (15 min, purple; 1 hour, black; 7 hours, green; 24 hours, red).
